# Supplementary material for: Comparative Studies on Behavioral, Cognitive and Biomolecular Profiling of ICR, C57BL/6 and Its Sub-Strains Suitable for Scopolamine-Induced Amnesic Models
Source: PubMed Central journal article supplement (PMC5578125; doi:10.3390/ijms18081735), 2017-08-09
Supplement: ijms-18-01735-s001.pdf [file ijms-18-01735-s001.pdf]

# Comparative Studies on Behavioral, Cognitive and Biomolecular Profiling of ICR, C57BL/6 and Its Sub-Strains Suitable for Scopolamine-Induced Amnesic Models

Govindarajan Karthivashan <sup>1</sup>, Shin-Young Park <sup>1</sup>, Joon-Soo Kim <sup>1</sup>, Duk-Yeon Cho <sup>1</sup>, Palanivel Ganesan <sup>1,2</sup> and Dong-Kug Choi <sup>1,2,\*</sup>

Supplement Figures:

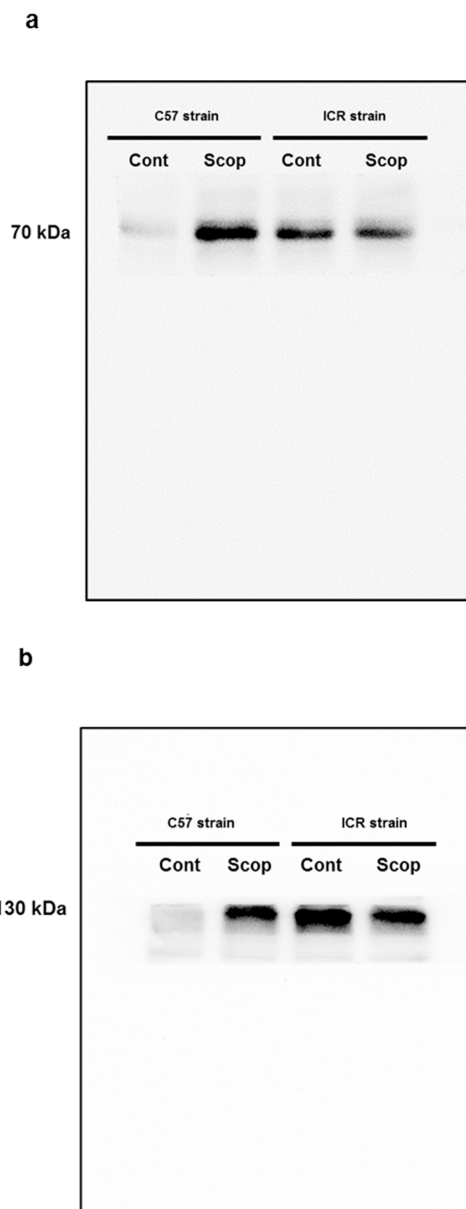

**Figure.S1.** ICR and C57BL/6 strains – a) COX-2 (70 kDa); b) iNOS (130 kDa).

**a**

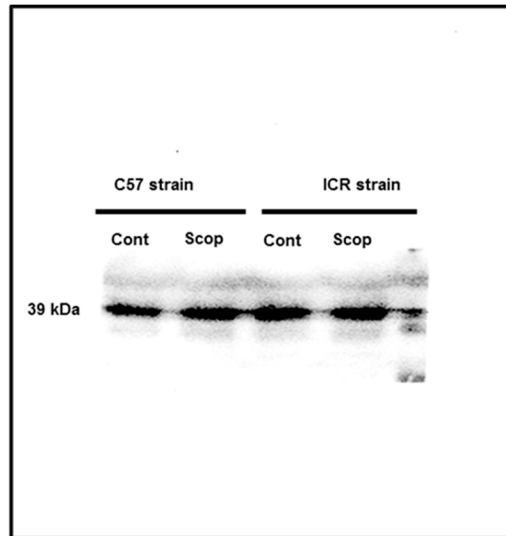

**b**

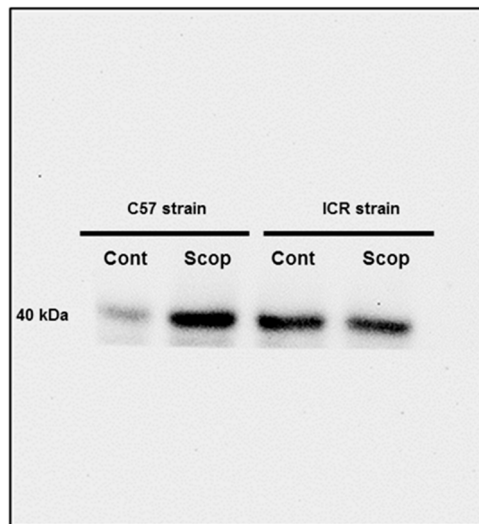

**Figure.S2.** ICR and C57BL/6 strains – a) Iκβα (39 kDa); b) p-Iκβα (40 kDa).

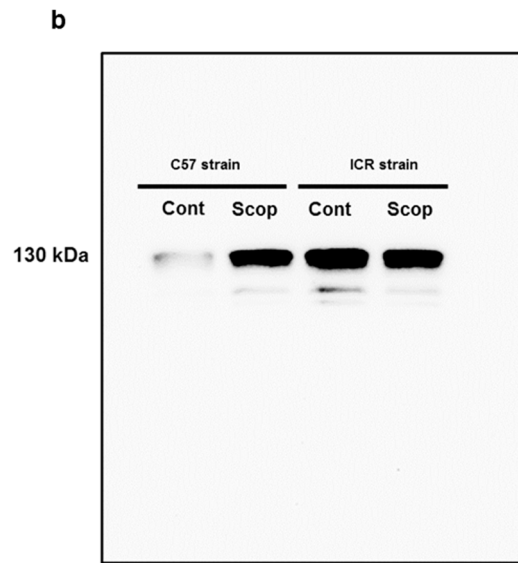

**Figure.S3.** ICR and C57BL/6 strains – a) COX-2 (70 kDa); b) iNOS (130 kDa).

a

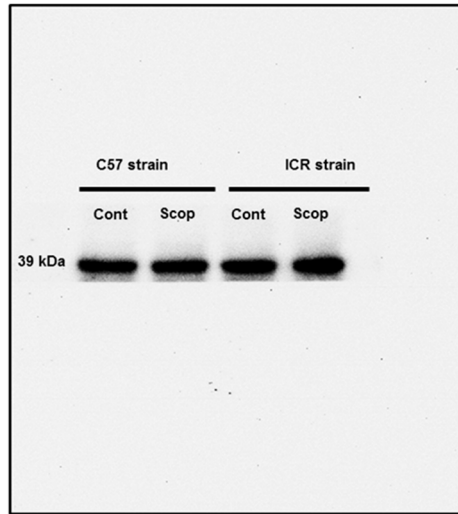

b

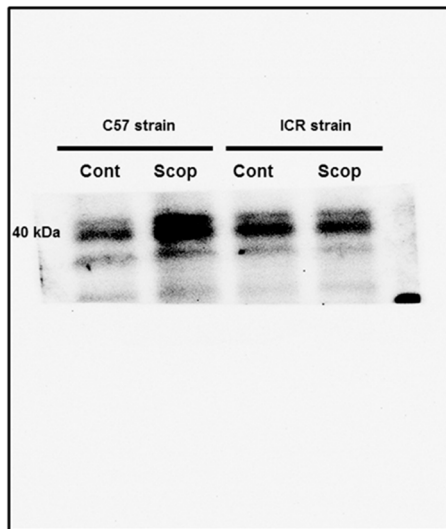

**Figure.S4.** ICR and C57BL/6 strains – a) Ikβα (39 kDa); b) p-Ikβα (40 kDa).

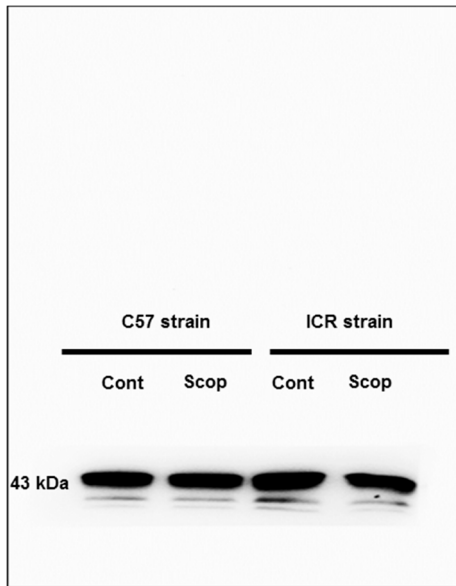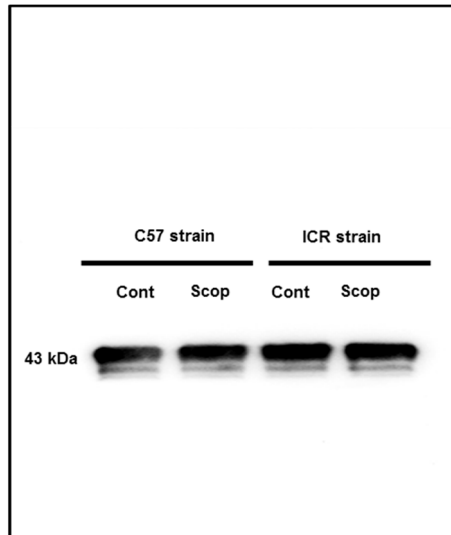

**Figure.S5.** ICR and C57BL/6 strains –  $\beta$ -actin (43 kDa)

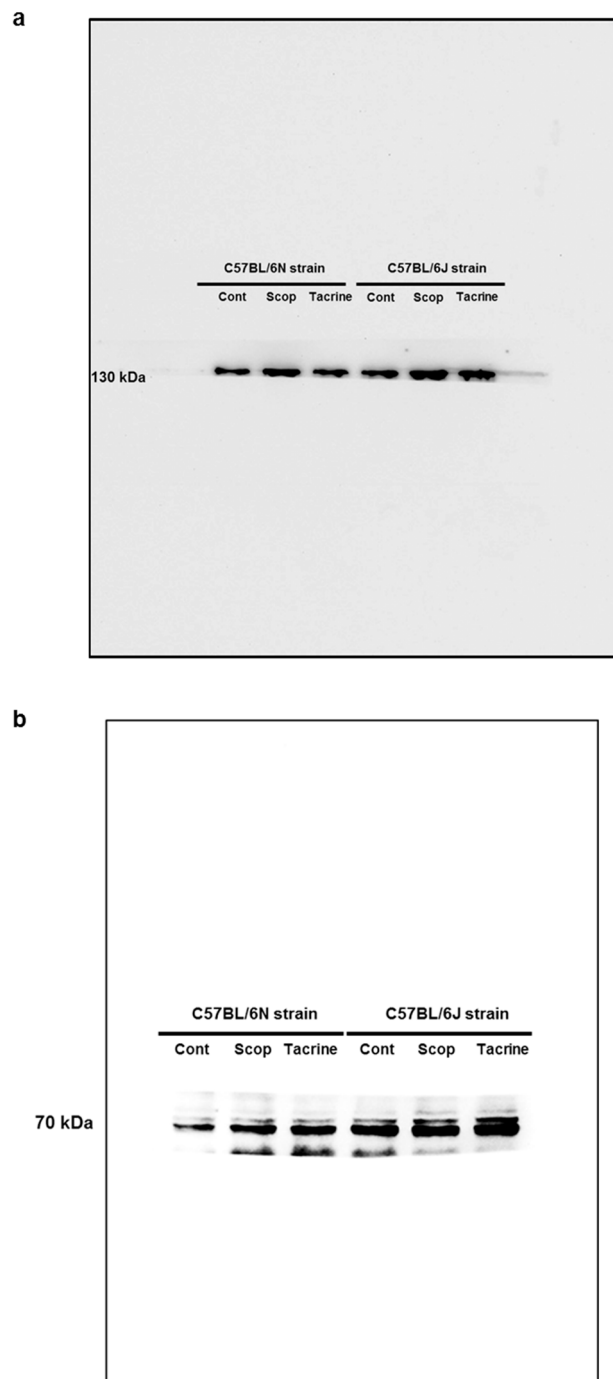

**Figure.S6.** C57BL/6N and C57BL/6J strains – a) iNOS (130 kDa); b) COX-2 (70 kDa)

a

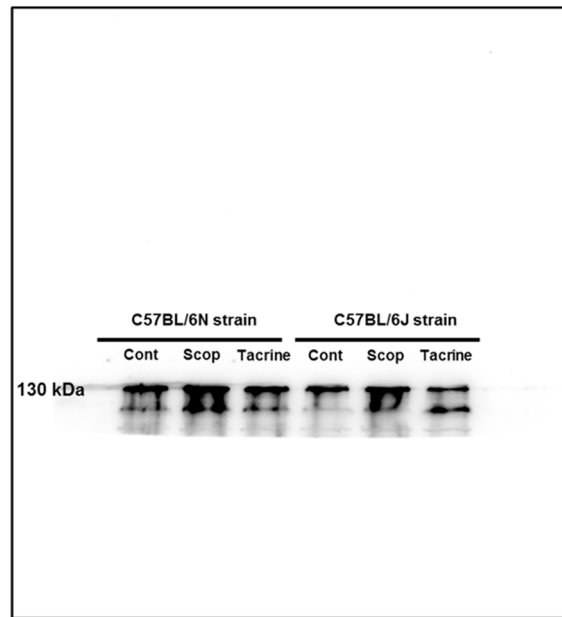

b

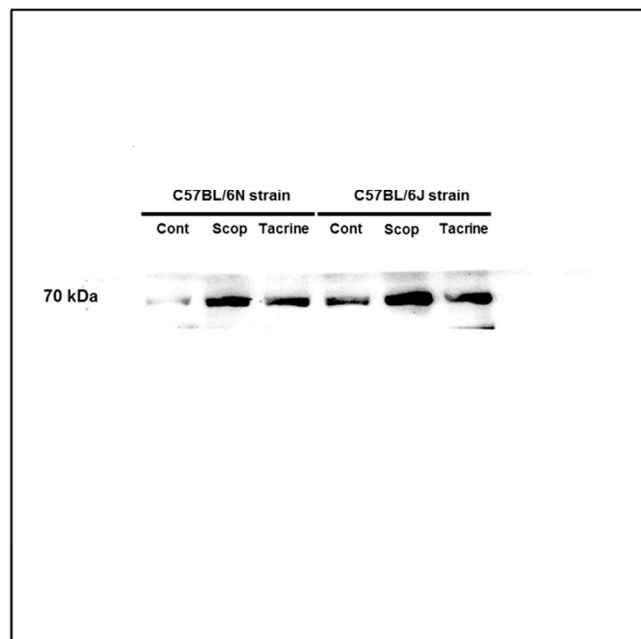

**Figure.S7.** C57BL/6N and C57BL/6J strains – a) iNOS (130 kDa); b) COX-2 (70 kDa)

a

| MDA std nmol      | 1     | 2     | N      | J     |        |       |       |       |       |       |
|-------------------|-------|-------|--------|-------|--------|-------|-------|-------|-------|-------|
| 0                 | 0.047 | 0.048 | C-Hip  | 0.078 | 0.079  | 0.079 | C-Hip | 0.079 | 0.081 | 0.079 |
| 1                 | 0.458 | 0.445 | C-C.C  | 0.076 | 0.077  | 0.080 | C-C.C | 0.078 | 0.078 | 0.079 |
| 2                 | 0.724 | 0.711 | S-Hip  | 0.093 | 0.093  | 0.090 | S-Hip | 0.092 | 0.093 | 0.095 |
| 3                 | 1.117 | 1.124 | S-C.C  | 0.090 | 0.091  | 0.089 | S-C.C | 0.092 | 0.087 | 0.088 |
| 4                 | 1.424 | 1.463 | T-Hip  | 0.086 | 0.087  | 0.085 | T-Hip | 0.091 | 0.087 | 0.090 |
| 5                 | 1.711 | 1.723 | T-C.C  | 0.084 | 0.084  | 0.082 | T-C.C | 0.087 | 0.085 | 0.085 |
|                   |       |       | N-Hipp |       | J-Hipp |       | N-C.C |       | J-C.C |       |
| Calculated values | Con   | 11.28 | 1.17   | 14.02 | 2.80   | 8.98  | 4.82  | 10.47 | 1.36  |       |
|                   | Scop  | 42.78 | 4.09   | 45.91 | 3.81   | 38.04 | 2.36  | 35.68 | 6.25  |       |
|                   | Tac   | 28.59 | 2.38   | 36.46 | 4.92   | 22.29 | 2.73  | 27.80 | 2.73  |       |

b

| SOD std           |       |       | N      | J     |        |       |       |       |       |       |
|-------------------|-------|-------|--------|-------|--------|-------|-------|-------|-------|-------|
| 1000              | 0.193 | 0.140 | C-Hip  | 0.436 | 0.429  | 0.431 | C-Hip | 0.428 | 0.439 | 0.437 |
| 500               | 0.227 | 0.223 | C-C.C  | 0.437 | 0.441  | 0.439 | C-C.C | 0.431 | 0.449 | 0.436 |
| 250               | 0.281 | 0.282 | S-Hip  | 0.454 | 0.457  | 0.447 | S-Hip | 0.437 | 0.446 | 0.442 |
| 125               | 0.285 | 0.285 | S-C.C  | 0.465 | 0.468  | 0.457 | S-C.C | 0.442 | 0.445 | 0.439 |
| 62.5              | 0.047 | 0.311 | T-Hip  | 0.439 | 0.440  | 0.443 | T-Hip | 0.441 | 0.443 | 0.437 |
| 31.25             | 0.417 | 0.464 | T-C.C  | 0.457 | 0.464  | 0.455 | T-C.C | 0.444 | 0.438 | 0.447 |
|                   |       |       | N-Hipp |       | J-Hipp |       | N-C.C |       | J-C.C |       |
| Calculated values | Con   | 41.89 | 1.54   | 40.75 | 2.50   | 38.90 | 0.85  | 39.04 | 3.98  |       |
|                   | Scop  | 33.08 | 1.50   | 37.77 | 1.92   | 28.56 | 2.41  | 37.62 | 1.28  |       |
|                   | Tac   | 38.19 | 0.89   | 38.33 | 1.30   | 30.52 | 2.01  | 37.20 | 1.95  |       |

c

| CAT std           |       |        | N      | J      |        |        |       |        |       |       |
|-------------------|-------|--------|--------|--------|--------|--------|-------|--------|-------|-------|
| 100               | 0.175 | 0.173  | C-Hip  | 0.944  | 0.972  | 0.946  | C-Hip | 1.012  | 0.992 | 0.984 |
| 50                | 0.441 | 0.462  | C-C.C  | 1.009  | 0.994  | 0.980  | C-C.C | 1.012  | 1.027 | 1.002 |
| 25                | 0.735 | 1.006  | S-Hip  | 1.039  | 1.003  | 1.034  | S-Hip | 1.032  | 1.009 | 1.002 |
| 12.5              | 1.181 | 1.181  | S-C.C  | 1.035  | 1.058  | 1.064  | S-C.C | 1.044  | 1.020 | 1.046 |
| 6.25              | 1.268 | 1.262  | T-Hip  | 0.955  | 0.990  | 0.968  | T-Hip | 1.027  | 0.991 | 0.990 |
| 3.125             | 1.318 | 1.298  | T-C.C  | 1.010  | 1.008  | 1.038  | T-C.C | 1.021  | 1.036 | 1.037 |
| 1.5625            | 1.323 | 1.321  |        |        |        |        |       |        |       |       |
| 0                 | 1.354 | 1.394  |        |        |        |        |       |        |       |       |
|                   |       |        | N-Hipp |        | J-Hipp |        | N-C.C |        | J-C.C |       |
| Calculated values | Con   | 688.91 | 28.73  | 595.38 | 24.56  | 598.22 | 31.34 | 665.29 | 34.59 |       |
|                   | Scop  | 545.43 | 34.18  | 564.16 | 28.40  | 499.45 | 26.80 | 528.13 | 21.59 |       |
|                   | Tac   | 637.96 | 26.81  | 584.03 | 36.45  | 556.78 | 31.08 | 535.21 | 15.47 |       |

d

| GPx (10 min)      | N      |        | J     |       |       |       |       |      |
|-------------------|--------|--------|-------|-------|-------|-------|-------|------|
| C-Hip             | 1.085  | 1.064  | 0.532 | C-Hip | 0.536 | 0.522 | 0.472 |      |
| C-C.C             | 1.033  | 1.012  | 0.486 | C-C.C | 0.519 | 0.486 | 0.465 |      |
| S-Hip             | 1.085  | 1.064  | 0.505 | S-Hip | 0.512 | 0.503 | 0.530 |      |
| S-C.C             | 1.058  | 1.037  | 0.506 | S-C.C | 0.523 | 0.488 | 0.468 |      |
| T-Hip             | 1.068  | 1.047  | 0.495 | T-Hip | 0.504 | 0.466 | 0.446 |      |
| T-C.C             | 1.078  | 1.057  | 0.518 | T-C.C | 0.531 | 0.537 | 0.534 |      |
|                   |        |        |       |       |       |       |       |      |
| GPx (20 min)      | N      |        | J     |       |       |       |       |      |
| C-Hip             | 0.871  | 0.865  | 0.328 | C-Hip | 0.335 | 0.331 | 0.301 |      |
| C-C.C             | 0.843  | 0.821  | 0.287 | C-C.C | 0.339 | 0.289 | 0.276 |      |
| S-Hip             | 0.958  | 0.949  | 0.382 | S-Hip | 0.369 | 0.333 | 0.372 |      |
| S-C.C             | 0.932  | 0.901  | 0.369 | S-C.C | 0.348 | 0.315 | 0.295 |      |
| T-Hip             | 0.872  | 0.865  | 0.324 | T-Hip | 0.340 | 0.308 | 0.271 |      |
| T-C.C             | 0.911  | 0.891  | 0.366 | T-C.C | 0.359 | 0.347 | 0.356 |      |
| Calculated values |        |        |       |       |       |       |       |      |
|                   | N-Hipp | J-Hipp | N-C.C | J-C.C |       |       |       |      |
| Con               | 32.84  | 1.71   | 28.81 | 3.42  | 30.07 | 1.10  | 29.03 | 1.90 |
| Scop              | 14.03  | 1.37   | 21.94 | 3.03  | 16.57 | 1.36  | 25.67 | 0.26 |
| Tac               | 27.76  | 2.81   | 23.88 | 1.93  | 22.99 | 1.88  | 27.09 | 2.05 |

**Figure S8:** Raw absorbance and corresponding calculated values of the a) lipid peroxidation (malondialdehyde, MDA); b) superoxide dismutase (SOD); c) catalase (CAT); d) glutathione peroxidase (GPx) levels in the hippocampus (Hipp) and cerebral cortex (C.C) of scopolamine-induced amnesic models—C57BL/6N and C57BL/6J sub-strains. Data are expressed as mean  $\pm$  SD ( $n = 4$ ; pooled biological replications).



**a**

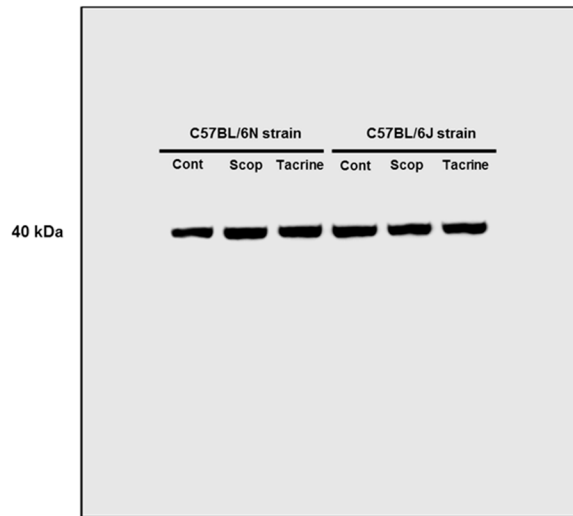

**b**

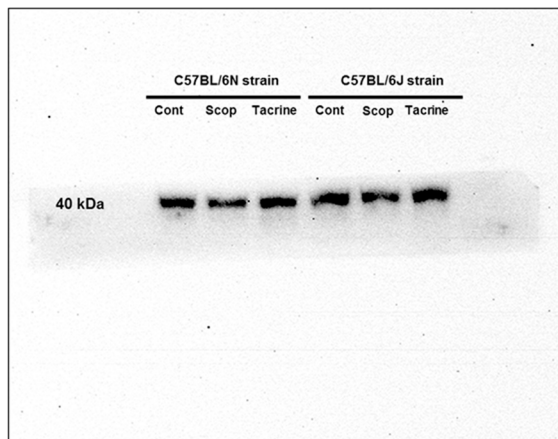

**Figure.S9.** C57BL/6N and C57BL/6J strains – a) CREB (40 kDa); p-CREB (40 kDa)

**a**

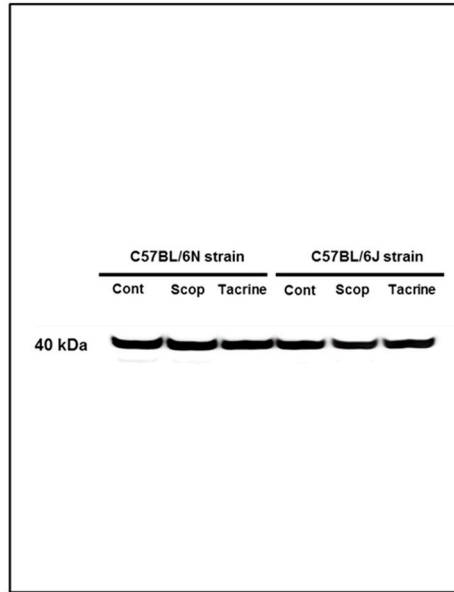

**b**

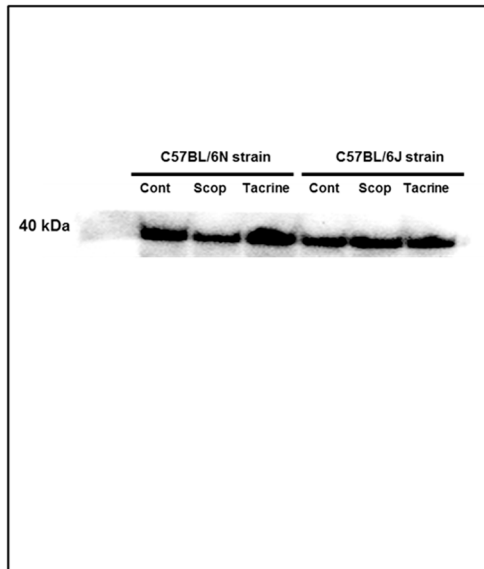

**Figure.S10.** C57BL/6N and C57BL/6J strains – a) CREB (40 kDa); p-CREB (40 kDa)

**a**

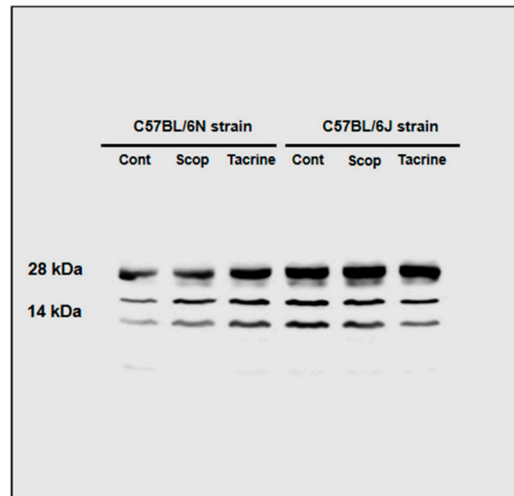

**b**

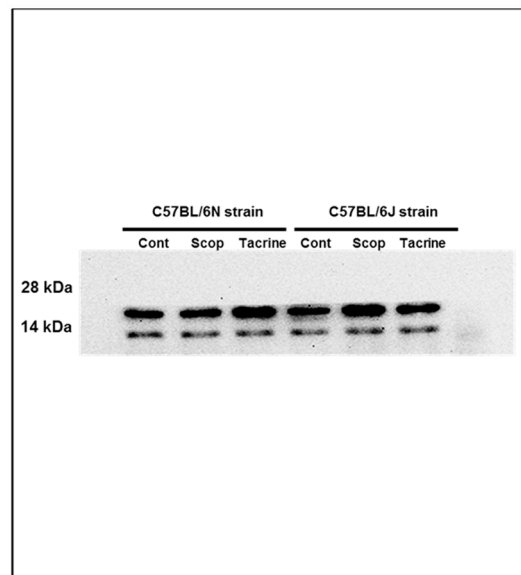

**Figure.S11.** C57BL/6N and C57BL/6J strains – BDNF (28 kDa); below bands represents monomer at approximately 14 kDa.

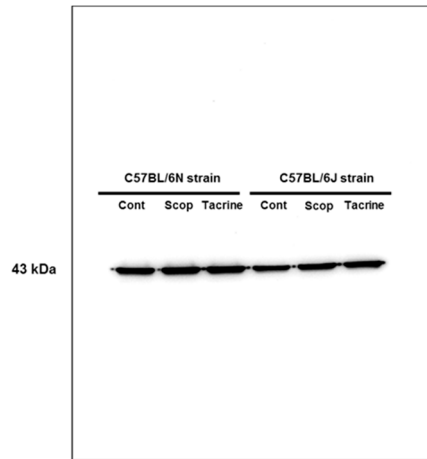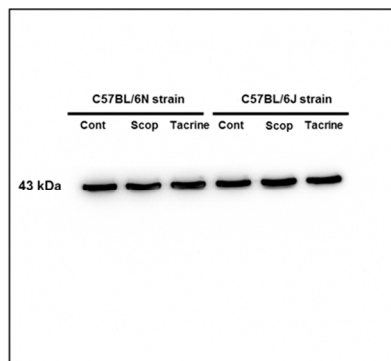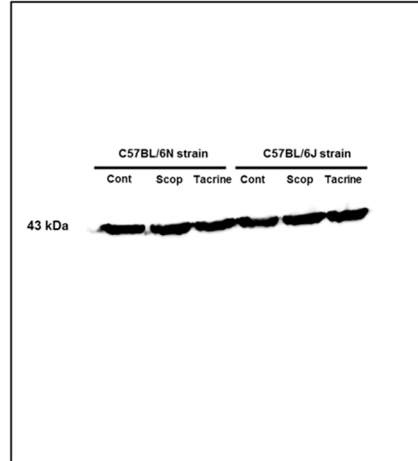

**Figure.S12.** C57BL/6N and C57BL/6J strains -  $\beta$ -actin (43 kDa).
